# Supplementary material for: N6-methyladenosine modification of CENPK mRNA by ZC3H13 promotes cervical cancer stemness and chemoresistance
Source: PubMed Central journal article supplement (PMC9008995; doi:10.1186/s40779-022-00378-z), 2022-04-14
Supplement: 40779_2022_378_MOESM1_ESM.pdf [file 40779_2022_378_MOESM1_ESM.pdf]

**Table S1** Sequences used in this study

| siRNAs              |           |                                | Sequences                      |
|---------------------|-----------|--------------------------------|--------------------------------|
| <i>CENPK</i> siRNA  | 1         | Sense                          | 5' GCUGCUGCGUAAUGGAAUU dTdT 3' |
|                     |           | Antisense                      | 3' dTdT CGACGACGCAUUACCUUAA 5' |
|                     | 2         | Sense                          | 5' GGAACAACGGUGGUUGGAU dTdT 3' |
|                     |           | Antisense                      | 3' dTdT CCUUGUUGCCACCAACCUA 5' |
| <i>SOX6</i> siRNA   | 1         | Sense                          | 5' CCACCCACAAAUUAACCAA dTdT 3' |
|                     |           | Antisense                      | 3' dTdT GGUGGGUGUUUAAUUGGUU 5' |
|                     | 2         | Sense                          | 5' GCCACUCUUACAACCACAA dTdT 3' |
|                     |           | Antisense                      | 3' dTdT CGGUGAGAAUGUUGGUGUU 5' |
| <i>p53</i> siRNA    | 1         | Sense                          | 5' GACUCCAGUGGUAUUCUAC dTdT 3' |
|                     |           | Antisense                      | 3' dTdT CUGAGGUCACCAUUAGAUG 5' |
|                     | 2         | Sense                          | 5' CUACUCCUGAAAACAACG dTdT 3'  |
|                     |           | Antisense                      | 3' dTdT GAUGAAGGACUUUUGUUGC 5' |
| <i>ZC3H13</i> siRNA | 1         | Sense                          | 5' GAGAGAGCUCCUAUGUUCU dTdT 3' |
|                     |           | Antisense                      | 3' dTdT CUCUCUCGAGGAUACAAGA 5' |
|                     | 2         | Sense                          | 5' GCUCCUAUGUUCUACACCU dTdT 3' |
|                     |           | Antisense                      | 3' dTdT CGAGGAUACAAGAUGUGGA 5' |
| Negative control    | Sense     | 5' UUCUCCGAACGUGUCACGU dTdT 3' |                                |
|                     | Antisense | 3' dTdT AAGAGGCUUGCACAGUGCA 5' |                                |

**Table S2** A list of antibodies used for ChIP, Co-IP, IF, IHC, and WB

| Antibody         | Cat. No    | Company     | Species | Dulution                                           |
|------------------|------------|-------------|---------|----------------------------------------------------|
| Flag             | F7425      | Sigma       | Rabbit  | 1:1000 (WB); 1:20 (Co-IP)                          |
| CENPK            | ab236739   | Abcam       | Rabbit  | 1:1000 (WB); 1:20 (Co-IP); 1:100 (IF); 1:100 (IHC) |
| ZC3H13           | ab70802    | Abcam       | Rabbit  | 1:2000 (WB)                                        |
| Ki67             | ab16667    | Abcam       | Rabbit  | 1:100 (IHC)                                        |
| SOX6             | ab243576   | Abcam       | Mouse   | 1:100 (IF)                                         |
| $\gamma$ -H2AX   | ab11174    | Abcam       | Rabbit  | 1:500 (IF)                                         |
| SOX6             | ab125196   | Abcam       | Rabbit  | 1:1000 (WB); 1:20 (Co-IP)                          |
| SOX6             | PA5-34616  | Invitrogen  | Rabbit  | 1:50 (ChIP)                                        |
| $\beta$ -catenin | 8480       | CST         | Rabbit  | 1:1000 (WB); 1:100 (IF)                            |
| c-Jun            | 19807      | CST         | Rabbit  | 1:1000 (WB)                                        |
| CD44             | 3570       | CST         | Mouse   | 1:1000 (IF)                                        |
| CD133            | 18470-1-AP | Proteintech | Rabbit  | 1:1000 (IF)                                        |
| c-Myc            | 10828-1-AP | Proteintech | Rabbit  | 1:1000 (WB)                                        |
| CCND1            | 60186-1-Ig | Proteintech | Mouse   | 1:1000 (WB)                                        |
| p53              | 10442-1-AP | Proteintech | Rabbit  | 1:1000 (WB)                                        |
| p21              | 10355-1-AP | Proteintech | Rabbit  | 1:1000 (WB)                                        |
| Vimentin         | 10366-1-AP | Proteintech | Rabbit  | 1:1000 (WB)                                        |
| Ubiquitin        | 10201-2-AP | Proteintech | Rabbit  | 1:1000 (WB)                                        |
| GAPDH            | 60004-1-Ig | Proteintech | Mouse   | 1:5000 (WB)                                        |
| Histone          | 17168-1-AP | Proteintech | Rabbit  | 1:1000 (WB)                                        |
| $\beta$ -actin   | 60008-1-Ig | Proteintech | Mouse   | 1:5000 (WB)                                        |

*ChIP* chromatin immunoprecipitation, *IF* immunofluorescence, *IHC* immunohistochemistry, *Co-IP* co-immunoprecipitation, *WB* western blotting

**Table S3** Correlation between CENPK expression and the clinicopathological characteristics of cervical cancer patients

| Characteristics                                 | CENPK expression [n(%)] |           | <i>P</i> |
|-------------------------------------------------|-------------------------|-----------|----------|
|                                                 | Low                     | High      |          |
| Age (years)                                     |                         |           | 0.427    |
| ≤ Median ( <i>n</i> = 58)                       | 27 (46.6)               | 31 (53.4) |          |
| > Median ( <i>n</i> = 61)                       | 24 (39.3)               | 37 (60.7) |          |
| pT classification                               |                         |           | 0.384    |
| T <sub>1</sub> -T <sub>2</sub> ( <i>n</i> = 96) | 43 (44.8)               | 53 (55.2) |          |
| T <sub>3</sub> -T <sub>4</sub> ( <i>n</i> = 23) | 8 (34.8)                | 15 (65.2) |          |
| pN classification                               |                         |           | 0.247    |
| N <sub>0</sub> ( <i>n</i> = 97)                 | 44 (45.4)               | 53 (54.6) |          |
| N <sub>1</sub> ( <i>n</i> = 22)                 | 7 (31.8)                | 15 (68.2) |          |
| Distant metastasis                              |                         |           |          |
| No ( <i>n</i> = 119)                            | 51 (42.9)               | 68 (57.1) |          |
| Yes ( <i>n</i> = 0)                             | 0 (0)                   | 0 (0)     |          |
| Recurrence                                      |                         |           | 0.008    |
| No ( <i>n</i> = 80)                             | 41 (51.2)               | 39 (48.8) |          |
| Yes ( <i>n</i> = 39)                            | 10 (25.6)               | 29 (74.4) |          |
| Histology grade                                 |                         |           | 0.670    |
| I-II ( <i>n</i> = 27)                           | 12 (44.4)               | 15 (55.6) |          |
| III ( <i>n</i> = 73)                            | 29 (39.7)               | 44 (60.3) |          |
| Ki67 status                                     |                         |           | < 0.001  |
| Low expression ( <i>n</i> = 56)                 | 33 (58.9)               | 23 (41.1) |          |
| High expression ( <i>n</i> = 41)                | 8 (19.5)                | 33 (80.5) |          |
